# Supplementary material for: Co-expression effect of LLGL2 and SLC7A5 to predict prognosis in ERα-positive breast cancer
Source: PubMed Central journal article supplement (PMC9529905; doi:10.1038/s41598-022-20225-4), 2022-10-03
Supplement: 41598_2022_20225_MOESM2_ESM.pdf [file 41598_2022_20225_MOESM2_ESM.pdf]

# Supplementary Tables

**Title:** Co-expression effect of LLGL2 and SLC7A5 to predict prognosis in ER $\alpha$ -positive breast cancer

**Author's name:** Tomoka Hisada, Naoto Kondo, Yumi Wanifuchi-Endo, Satoshi Osaga, Takashi Fujita, Tomoko Asano, Yasuaki Uemoto, Sayaka Nishikawa, Yusuke Katagiri, Mitsuo Terada, Akiko Kato, Hiroshi Sugiura, Katsuhiro Okuda, Hiroyuki Kato, Masayuki Komura, Satoshi Morita, Satoru Takahashi, and Tatsuya Toyama

## Supplementary Table S1

Association between *LLGL2* mRNA expression and clinicopathological characteristics in all breast cancer patients

|                   | All patients<br>n (%) | <i>LLGL2</i> mRNA expression |               | P value |
|-------------------|-----------------------|------------------------------|---------------|---------|
|                   |                       | Low<br>n (%)                 | High<br>n (%) |         |
| Patients          | 624                   | 337                          | 287           |         |
| Menopausal status |                       |                              |               | 0.46    |
| Pre               | 262 (42.0)            | 146 (43)                     | 116(43)       |         |
| Post              | 360 (57.7)            | 189(56)                      | 171(57)       |         |
| Unknown           | 2 (0.3)               | 2 (1)                        |               |         |
| Tumor size        |                       |                              |               | 0.047   |
| ≤2cm              | 240 (38.4)            | 117 (34.7)                   | 123 (43)      |         |
| >2cm              | 383 (61.4)            | 219 (65.0)                   | 164 (57)      |         |
| Unknown           | 1 (0.2)               | 1 (0.3)                      |               |         |
| Nodal status      |                       |                              |               | 0.031   |
| Negative          | 339 (54)              | 196 (58)                     | 143 (50)      |         |
| Positive          | 257 (41)              | 125 (37)                     | 132 (46)      |         |
| Unknown           | 28 (5)                | 16 (5)                       | 12 (4)        |         |
| Grade             |                       |                              |               | 0.62    |
| 1                 | 164 (26)              | 89 (27)                      | 75 (26)       |         |
| 2                 | 191 (31)              | 98 (29)                      | 93 (32)       |         |
| 3                 | 253 (41)              | 141 (42)                     | 112 (39)      |         |
| Unknown           | 16 (3)                | 7 (2)                        | 9 (3)         |         |
| Histology         |                       |                              |               | 0.37    |
| IDC               | 556 (89)              | 301(89)                      | 255 (89)      |         |
| ILC               | 27 (4)                | 9 (3)                        | 18 (6)        |         |
| Others            | 41 (7)                | 27 (8)                       | 14 (5)        |         |
| ERα status        |                       |                              |               | 0.28    |
| Positive          | 491 (78.7)            | 259 (76.9)                   | 232 (81)      |         |
| Negative          | 132 (21.1)            | 77 (22.8)                    | 55 (19)       |         |
| Unknown           | 1 (0.2)               | 1 (0.3)                      | 0 (0)         |         |
| PgR status        |                       |                              |               | 0.93    |
| Positive          | 442 (71)              | 239 (71)                     | 203 (71)      |         |
| Negative          | 181 (29)              | 97 (29)                      | 84 (29)       |         |
| Unknown           | 1 (0.2)               |                              |               |         |
| HER2 status       |                       |                              |               | 0.34    |
| Positive          | 82 (13)               | 40 (12)                      | 42 (15)       |         |
| Negative          | 518 (83)              | 283 (84)                     | 235 (82)      |         |
| Unknown           | 24 (4)                | 14 (4)                       | 10 (3)        |         |
| Adjuvant therapy  |                       |                              |               |         |
| ET alone          | 265 (42)              | 150 (45)                     | 115 (40)      |         |
| CT alone          | 92 (15)               | 62 (18)                      | 30 (10)       |         |
| ET+CT             | 206 (33)              | 92 (27)                      | 114 (40)      |         |
| None              | 51 (8)                | 26 (8)                       | 25 (9)        |         |
| Unknown           | 10 (2)                | 7 (2)                        | 3 (1)         |         |

ERα, estrogen receptor α; PgR, progesterone receptor; IDC, invasive ductal carcinoma; ILC, invasive lobular carcinoma; HER2, human epidermal growth factor receptor 2; ET, endocrine therapy; CT, chemotherapy.

## Supplementary Table S2

Association between *LLGL2* mRNA expression and clinicopathological characteristics in ER $\alpha$ -breast cancer patients

|                   | All patients<br>n (%) | <i>LLGL2</i> mRNA expression |               | <i>P</i> value |
|-------------------|-----------------------|------------------------------|---------------|----------------|
|                   |                       | Low<br>n (%)                 | High<br>n (%) |                |
| Patients          | 491                   | 259                          | 232           |                |
| Menopausal status |                       |                              |               | 0.36           |
| Pre               | 216 (44)              | 119 (46)                     | 97 (42)       |                |
| Post              | 275 (56)              | 140 (54)                     | 135 (58)      |                |
| Tumor size        |                       |                              |               | 0.10           |
| $\leq 2$ cm       | 207 (42)              | 100 (38)                     | 107 (46)      |                |
| $> 2$ cm          | 284 (58)              | 159 (62)                     | 125 (54)      |                |
| Nodal status      |                       |                              |               | 0.007          |
| Negative          | 258 (53)              | 151 (59)                     | 107 (46)      |                |
| Positive          | 209 (43)              | 96 (37)                      | 113 (49)      |                |
| Unknown           | 24 (4)                | 12 (5)                       | 12 (5)        |                |
| Grade             |                       |                              |               | 0.67           |
| 1                 | 160 (33)              | 87 (34)                      | 73 (32)       |                |
| 2                 | 153 (31)              | 78 (30)                      | 75 (32)       |                |
| 3                 | 166 (34)              | 89 (34)                      | 77 (33)       |                |
| Unknown           | 12 (2)                | 5 (2)                        | 7 (3)         |                |
| Histology         |                       |                              |               | 0.12           |
| IDC               | 438 (89.2)            | 234 (90)                     | 205 (88)      |                |
| ILC               | 26 (5.3)              | 9 (3)                        | 17 (7)        |                |
| Others            | 26 (5.3)              | 16 (7)                       | 10 (4)        |                |
| Unknown           | 1 (0.2)               | 0                            | 0             |                |
| PgR status        |                       |                              |               | 0.09           |
| Positive          | 426 (87)              | 231 (89)                     | 195 (84)      |                |
| Negative          | 65 (13)               | 28 (11)                      | 37 (16)       |                |
| Unknown           | 0                     | 0                            | 0             |                |
| HER2 status       |                       |                              |               | 0.44           |
| Positive          | 45 (9)                | 21 (8)                       | 24 (10)       |                |
| Negative          | 429 (87)              | 227 (88)                     | 202 (87)      |                |
| Unknown           | 17 (4)                | 11 (4)                       | 6 (3)         |                |
| Adjuvant therapy  |                       |                              |               |                |
| ET alone          | 251 (51)              | 141 (54)                     | 110 (47)      |                |
| CT alone          | 29 (6)                | 22 (8)                       | 7 (3)         |                |
| ET+CT             | 173 (35)              | 77 (30)                      | 96 (41)       |                |
| None              | 32 (7)                | 15 (6)                       | 17 (7)        |                |
| Unknown           | 7 (1)                 | 5 (2)                        | 2 (1)         |                |
| Endocrine therapy |                       |                              |               |                |
| With tamoxifen    | 272 (56)              | 143 (55)                     | 129 (56)      |                |
| Without tamoxifen | 152 (31)              | 75 (29)                      | 77 (33)       |                |
| None              | 60 (12)               | 36 (14)                      | 24 (10)       |                |
| Unknown           | 7 (1)                 | 5 (2)                        | 2 (1)         |                |

PgR, progesterone receptor; IDC, invasive ductal carcinoma; ILC, invasive lobular carcinoma; HER2, human epidermal growth factor receptor 2; ET, endocrine therapy; CT, chemotherapy.

### Supplementary Table S3

Univariate and multivariate analyses of factors associated with DFS and OS including *LLGL2* in all patients

| Variate                      | n (%)    | Univariate      | Univariate      | Multivariate    |                   | Multivariate    |                   |
|------------------------------|----------|-----------------|-----------------|-----------------|-------------------|-----------------|-------------------|
|                              |          | (DFS)           | (OS)            | (DFS)           | (OS)              | (DFS)           | (OS)              |
|                              |          | <i>P</i> -value | <i>P</i> -value | <i>P</i> -value | HR (95% CI)       | <i>P</i> -value | HR (95% CI)       |
| Menopausal status            |          |                 |                 |                 |                   |                 |                   |
| Pre                          | 247 (44) |                 |                 |                 |                   |                 |                   |
| Post                         | 313 (56) | 0.49            | 0.44            |                 |                   |                 |                   |
| Tumor size                   |          |                 |                 |                 |                   |                 |                   |
| ≤ 2 cm                       | 215 (38) |                 |                 |                 |                   |                 | 1 (Reference)     |
| > 2 cm                       | 345 (62) | 0.041           | 0.003           |                 |                   | 0.064           | 1.53 (0.98, 2.39) |
| Nodal status                 |          |                 |                 |                 |                   |                 |                   |
| Negative                     | 316 (56) |                 |                 |                 | 1 (Reference)     |                 | 1 (Reference)     |
| Positive                     | 244 (44) | < 0.0001        | < 0.0001        | < 0.0001        | 3.71 (2.64, 5.22) | < 0.0001        | 3.70 (2.45, 5.59) |
| Grade                        |          |                 |                 |                 |                   |                 |                   |
| 1 and 2                      | 323 (58) |                 |                 |                 |                   |                 |                   |
| 3                            | 237 (42) | 0.039           | 0.022           |                 |                   |                 |                   |
| Histology                    |          |                 |                 |                 |                   |                 |                   |
| IDC                          | 509 (91) |                 |                 |                 |                   |                 |                   |
| ILC                          | 19 (3)   | 0.93            | 0.67            |                 |                   |                 |                   |
| Others                       | 32 (6)   | 0.20            | 0.47            |                 |                   |                 |                   |
| ERα status                   |          |                 |                 |                 |                   |                 |                   |
| Positive                     | 443 (79) |                 |                 |                 | 1 (Reference)     |                 | 1 (Reference)     |
| Negative                     | 117 (21) | 0.001           | 0.001           | < 0.0001        | 2.18 (1.53, 3.10) | < 0.0001        | 2.29 (1.52, 3.45) |
| HER2 status                  |          |                 |                 |                 |                   |                 |                   |
| Negative                     | 484 (86) |                 |                 |                 |                   |                 |                   |
| Positive                     | 76 (14)  | 0.042           | 0.042           |                 |                   |                 |                   |
| <i>LLGL2</i> mRNA expression |          |                 |                 |                 |                   |                 |                   |
| Low                          | 299 (53) |                 |                 |                 | 1 (Reference)     |                 | 1 (Reference)     |
| High                         | 261 (47) | 0.026           | 0.10            | 0.083           | 1.33 (0.96, 1.82) | 0.17            | 1.30 (0.89, 1.89) |

ERα, estrogen receptor α; PgR, progesterone receptor; IDC, invasive ductal carcinoma; ILC, invasive lobular carcinoma; HER2, human epidermal growth factor receptor 2; ET, endocrine therapy; CT, chemotherapy.

### Supplementary Table S4

Univariate and multivariate analyses of factors associated with DFS and OS including *LLGL2* in ER $\alpha$ -positive breast cancer patients

| Variate                      | n (%)    | Univariate      | Univariate      | Multivariate    |                   | Multivariate    |                   |
|------------------------------|----------|-----------------|-----------------|-----------------|-------------------|-----------------|-------------------|
|                              |          | (DFS)           | (OS)            | (DFS)           | (OS)              | (DFS)           | (OS)              |
|                              |          | <i>P</i> -value | <i>P</i> -value | <i>P</i> -value | HR (95% CI)       | <i>P</i> -value | HR (95% CI)       |
| Menopausal status            |          |                 |                 |                 |                   |                 |                   |
| Pre                          | 206 (46) |                 |                 |                 |                   |                 |                   |
| Post                         | 237 (54) | 0.29            | 0.20            |                 |                   |                 |                   |
| Tumor size                   |          |                 |                 |                 |                   |                 |                   |
| ≤ 2 cm                       | 184 (42) |                 |                 |                 |                   |                 | 1 (Reference)     |
| > 2 cm                       | 259 (58) | 0.14            | 0.011           |                 |                   | 0.043           | 1.53 (0.98, 2.39) |
| Nodal status                 |          |                 |                 |                 |                   |                 |                   |
| Negative                     | 244 (55) |                 |                 |                 | 1 (Reference)     |                 | 1 (Reference)     |
| Positive                     | 199 (45) | < 0.0001        | < 0.0001        | < 0.0001        | 3.07 (2.05, 4.61) | < 0.0001        | 2.90 (1.76, 4.77) |
| Grade                        |          |                 |                 |                 |                   |                 |                   |
| 1 and 2                      | 287 (65) |                 |                 |                 |                   |                 |                   |
| 3                            | 156 (35) | 0.39            | 0.11            |                 |                   |                 |                   |
| Histology                    |          |                 |                 |                 |                   |                 |                   |
| IDC                          | 402 (91) |                 |                 |                 |                   |                 |                   |
| ILC                          | 18 (4)   | 0.6             | 0.37            |                 |                   |                 |                   |
| Others                       | 23 (5)   | 0.09            | 0.29            |                 |                   |                 |                   |
| HER2 status                  |          |                 |                 |                 |                   |                 |                   |
| Negative                     | 402 (91) |                 |                 |                 | 1 (Reference)     |                 | 1 (Reference)     |
| Positive                     | 41 (9)   | 0.19            | 0.038           | 0.04            | 1.84 (1.02, 3.29) | 0.004           | 2.58 (1.35, 4.95) |
| <i>LLGL2</i> mRNA expression |          |                 |                 |                 |                   |                 |                   |
| Low                          | 233 (53) |                 |                 |                 | 1 (Reference)     |                 | 1 (Reference)     |
| High                         | 260 (47) | 0.002           | 0.007           | 0.012           | 1.80 (1.14, 2.84) | 0.011           | 2.15 (1.20, 3.86) |

IDC, invasive ductal carcinoma; ILC, invasive lobular carcinoma; HER2, human epidermal growth factor receptor 2; ET, endocrine therapy; CT, chemotherapy.

### Supplementary Table S5

Association between *SLC7A5* mRNA expression and clinicopathological characteristics in ER $\alpha$ -positive breast cancer patients

|                   | All patients<br>n (%) | <i>SLC7A5</i> mRNA expression |               | <i>P</i> value |
|-------------------|-----------------------|-------------------------------|---------------|----------------|
|                   |                       | Low<br>n (%)                  | High<br>n (%) |                |
| Patients          | 491                   | 175                           | 316           |                |
| Menopausal status |                       |                               |               | 0.058          |
| Pre               | 216 (44)              | 87 (50)                       | 129 (41)      |                |
| Post              | 275 (56)              | 88 (50)                       | 187 (59)      |                |
| Tumor size        |                       |                               |               | 1              |
| $\leq 2$ cm       | 207 (42)              | 74 (42)                       | 133 (42)      |                |
| $> 2$ cm          | 284 (58)              | 101 (58)                      | 183 (58)      |                |
| Nodal status      |                       |                               |               | 0.009          |
| Negative          | 258 (53)              | 106 (61)                      | 152 (48)      |                |
| Positive          | 209 (43)              | 61 (35)                       | 148 (47)      |                |
| Unknown           | 24 (5)                | 8 (4)                         | 16 (5)        |                |
| Grade             |                       |                               |               | 0.008          |
| 1                 | 160 (33)              | 65 (37)                       | 95 (30)       |                |
| 2                 | 155 (32)              | 63 (36)                       | 92 (29)       |                |
| 3                 | 144 (29)              | 43 (25)                       | 121 (38)      |                |
| Unknown           | 12 (2)                | 4 (2)                         | 8 (3)         |                |
| Histology         |                       |                               |               | 0.46           |
| IDC               | 438 (89)              | 152 (87)                      | 286 (91)      |                |
| ILC               | 26 (5)                | 10 (6)                        | 16 (5)        |                |
| Others            | 27 (6)                | 12 (7)                        | 14 (4)        |                |
| PgR status        |                       |                               |               | 1              |
| Positive          | 426 (87)              | 152 (87)                      | 274 (87)      |                |
| Negative          | 65 (13)               | 23 (13)                       | 42 (13)       |                |
| HER2 status       |                       |                               |               | 1              |
| Positive          | 45 (9)                | 17 (10)                       | 28 (10)       |                |
| Negative          | 429 (87)              | 153 (87)                      | 276 (87)      |                |
| Unknown           | 17 (4)                | 5 (3)                         | 12 (3)        |                |
| Adjuvant therapy  |                       |                               |               |                |
| ET alone          | 251 (51)              | 103 (58)                      | 148 (47)      |                |
| CT alone          | 29 (6)                | 4 (2)                         | 25 (8)        |                |
| ET+CT             | 173 (35)              | 57 (33)                       | 116 (37)      |                |
| None              | 31 (7)                | 10 (6)                        | 21 (6)        |                |
| Unknown           | 7 (1)                 | 1 (1)                         | 6 (2)         |                |
| Endocrine therapy |                       |                               |               |                |
| With tamoxifen    | 272 (56)              | 105 (60)                      | 167 (53)      |                |
| Without tamoxifen | 181 (31)              | 59 (34)                       | 122 (37)      |                |
| None              | 31 (12)               | 10 (6)                        | 21 (7)        |                |
| Unknown           | 7 (1)                 | 1 (0)                         | 6 (2)         |                |

PgR, progesterone receptor; IDC, invasive ductal carcinoma; ILC, invasive lobular carcinoma; HER2, human epidermal growth factor receptor 2; ET, endocrine therapy; CT, chemotherapy.

### Supplementary Table S6

Association between *LLGL2* and *SLC7A5* mRNA co-expression and clinicopathological characteristics in all breast cancer patients

|                          | <i>LLGL2/SLC7A5</i> |                   |                   |                    | <i>P</i> value |
|--------------------------|---------------------|-------------------|-------------------|--------------------|----------------|
|                          | Low/Low<br>n (%)    | High/Low<br>n (%) | Low/High<br>n (%) | High/High<br>n (%) |                |
| Patients                 | 91                  | 101               | 246               | 186                |                |
| Menopausal status        |                     |                   |                   |                    |                |
| Pre                      | 49 (39)             | 48 (48)           | 97 (40)           | 68 (37)            | 0.026          |
| Post                     | 42 (61)             | 53 (52)           | 147 (60)          | 118 (63)           |                |
| Tumor size               |                     |                   |                   |                    |                |
| ≤2cm                     | 31 (34)             | 47 (46)           | 86 (35)           | 76 (41)            | 0.162          |
| >2cm                     | 60 (66)             | 54 (54)           | 159 (65)          | 110 (59)           |                |
| Unknown                  |                     |                   | 1 (0.4)           |                    |                |
| Nodal status             |                     |                   |                   |                    |                |
| Negative                 | 62 (68)             | 56 (55)           | 134 (54)          | 87 (47)            | 0.007          |
| Positive                 | 25 (28)             | 41 (41)           | 100 (41)          | 91 (49)            |                |
| Unknown                  | 4 (4)               | 4 (4)             | 12 (5)            | 8 (4)              |                |
| pStage TNM* <sup>1</sup> |                     |                   |                   |                    |                |
| I                        | 30 (33)             | 32 (32)           | 62 (25)           | 47 (25)            | 0.047          |
| II                       | 46 (51)             | 48 (47)           | 119 (48)          | 91 (49)            |                |
| III                      | 11 (12)             | 15 (15)           | 51 (21)           | 38 (21)            |                |
| Unknown                  | 4 (4)               | 6 (6)             | 14 (6)            | 10 (5)             |                |
| Grade                    |                     |                   |                   |                    |                |
| 1+2                      | 66 (73)             | 64 (63)           | 121 (49)          | 104 (56)           | 0.0008         |
| 3                        | 23 (25)             | 35 (35)           | 118 (48)          | 77 (41)            |                |
| Unknown                  | 2 (2)               | 2 (2)             | 7 (3)             | 5 (3)              |                |
| Histology                |                     |                   |                   |                    |                |
| IDC                      | 78 (87)             | 89 (88)           | 223 (91)          | 166 (89)           | 0.23           |
| ILC                      | 4 (4)               | 6 (6)             | 5 (2)             | 12 (7)             |                |
| Others                   | 8 (9)               | 6 (6)             | 18 (7)            | 8 (4)              |                |
| Unknown                  |                     |                   | 1 (0.4)           |                    |                |
| ERα status               |                     |                   |                   |                    |                |
| Positive                 | 84 (92)             | 91 (90)           | 175 (71)          | 141 (76)           | <0.001         |
| Negative                 | 7 (8)               | 10 (10)           | 70 (29)           | 45 (24)            |                |
| Unknown                  |                     |                   | 1 (0.4)           |                    |                |
| PgR status               |                     |                   |                   |                    |                |
| Positive                 | 77 (85)             | 79 (78)           | 162 (66)          | 124 (67)           | 0.002          |
| Negative                 | 14 (15)             | 22 (22)           | 83 (34)           | 62 (33)            |                |
| Unknown                  |                     |                   | 1 (0.4)           |                    |                |
| HER2 status              |                     |                   |                   |                    |                |
| Positive                 | 7 (8)               | 16 (16)           | 33 (13)           | 26 (14)            | 0.59           |
| Negative                 | 79 (87)             | 83 (82)           | 204 (83)          | 152 (82)           |                |
| Unknown                  | 5 (5)               | 2 (2)             | 9 (4)             | 8 (4)              |                |
| Adjuvant therapy         |                     |                   |                   |                    |                |
| ET alone                 | 58 (64)             | 48 (47)           | 92 (37)           | 67 (36)            |                |
| CT alone                 | 6 (7)               | 5 (5)             | 56 (23)           | 25 (13)            |                |
| ET+CT                    | 24 (26)             | 38 (37)           | 68 (28)           | 76 (41)            |                |
| None                     | 3 (3)               | 9 (9)             | 23 (9)            | 16 (9)             |                |
| Unknown                  |                     | 1 (1)             | 7 (3)             | 2 (1)              |                |

ERα, estrogen receptor α; PgR, progesterone receptor; IDC, invasive ductal carcinoma; ILC, invasive lobular carcinoma; HER2, human epidermal growth factor receptor 2; ET, endocrine therapy; CT, chemotherapy.

\*1: AJCC stage

### Supplementary Table S7

Univariate and multivariate analyses of factors associated with DFS and OS including *LLGL2/SLC7A5* in all patients

| Variate             | n (%)    | Univariate      | Univariate      | Multivariate    | Multivariate      |                 |                    |
|---------------------|----------|-----------------|-----------------|-----------------|-------------------|-----------------|--------------------|
|                     |          | (DFS)           | (OS)            | (DFS)           | (OS)              | HR (95% CI)     | HR (95% CI)        |
|                     |          | <i>P</i> -value | <i>P</i> -value | <i>P</i> -value |                   | <i>P</i> -value |                    |
| Age                 |          |                 |                 |                 |                   |                 |                    |
| ≤ 50                | 236 (42) |                 |                 |                 |                   |                 |                    |
| > 50                | 324 (58) | 0.34            | 0.53            |                 |                   |                 |                    |
| Menopausal status   |          |                 |                 |                 |                   |                 |                    |
| Pre                 | 247 (44) |                 |                 |                 |                   |                 |                    |
| Post                | 313 (56) | 0.49            | 0.44            |                 |                   |                 |                    |
| Tumor size          |          |                 |                 |                 |                   |                 |                    |
| ≤ 2 cm              | 215 (38) |                 |                 |                 |                   |                 | 1 (Reference)      |
| > 2 cm              | 345 (62) | 0.041           | 0.003           |                 |                   | 0.06            | 1.53 (0.98, 2.39)  |
| Nodal status        |          |                 |                 |                 |                   |                 |                    |
| Negative            | 316 (56) |                 |                 |                 | 1 (Reference)     |                 | 1 (Reference)      |
| Positive            | 244 (44) | < 0.0001        | < 0.0001        | < 0.0001        | 3.49 (2.48, 4.92) | < 0.0001        | 3.42 (2.26, 5.18)  |
| Grade               |          |                 |                 |                 |                   |                 |                    |
| 1 and 2             | 323 (58) |                 |                 |                 |                   |                 |                    |
| 3                   | 237 (42) | 0.039           | 0.022           |                 |                   |                 |                    |
| Histology           |          |                 |                 |                 |                   |                 |                    |
| IDC                 | 509 (91) |                 |                 |                 |                   |                 |                    |
| ILC                 | 19 (3)   | 0.93            | 0.67            |                 |                   |                 |                    |
| Others              | 32 (6)   | 0.20            | 0.47            |                 |                   |                 |                    |
| ER $\alpha$ status  |          |                 |                 |                 |                   |                 |                    |
| Positive            | 443 (79) |                 |                 |                 | 1 (Reference)     |                 | 1 (Reference)      |
| Negative            | 117 (21) | 0.001           | 0.001           | 0.0003          | 1.94 (1.36, 2.78) | 0.001           | 1.99 (1.31, 3.01)  |
| HER2 status         |          |                 |                 |                 |                   |                 |                    |
| Negative            | 484 (86) |                 |                 |                 |                   |                 |                    |
| Positive            | 76 (14)  | 0.042           | 0.042           |                 |                   |                 |                    |
| <i>LLGL2/SLC7A5</i> |          |                 |                 |                 |                   |                 |                    |
| Low/Low             | 81 (14)  |                 |                 |                 | 1 (Reference)     |                 | 1 (Reference)      |
| High/Low            | 94 (17)  | 0.004           | 0.032           | 0.013           | 2.95 (1.26, 6.92) | 0.051           | 3.12 (0.99, 9.75)  |
| Low/High            | 218 (39) | 0.0005          | 0.001           | 0.007           | 2.98 (1.35, 6.54) | 0.008           | 3.98 (1.42, 11.13) |
| High/High           | 167 (30) | < 0.0001        | 0.0003          | 0.002           | 3.49 (1.58, 7.72) | 0.003           | 4.79 (1.70, 13.52) |

ER $\alpha$ , estrogen receptor  $\alpha$ ; PgR, progesterone receptor; IDC, invasive ductal carcinoma; ILC, invasive lobular carcinoma; HER2, human epidermal growth factor receptor 2.
